# Supplementary material
Source: publisher figshare collection journal article supplement (https://acs.figshare.com/ndownloader/files/5825271)
Supplement: Supplementary file 1 [file 5825271]

data_NAPDIA 
 
_audit_creation_method            SHELXL-97 
_chemical_name_systematic 
; 
1,4,5,8-Naphthalenetetracarboxylic 1,8:4,5 diimide 
; 

_chemical_name_common             '1,4,5,8-Naphthaldiimide'
_chemical_melting_point           ? 
_chemical_formula_moiety         'C14 H6 N2 O4' 
_chemical_formula_sum            'C14 H6 N2 O4' 
_chemical_formula_weight          266.21 
 
loop_ 
 _atom_type_symbol 
 _atom_type_description 
 _atom_type_scat_dispersion_real 
 _atom_type_scat_dispersion_imag 
 _atom_type_scat_source 
 'C'  'C'   0.0033   0.0016 
 'International Tables Vol C Tables 4.2.6.8 and 6.1.1.4' 
 'H'  'H'   0.0000   0.0000 
 'International Tables Vol C Tables 4.2.6.8 and 6.1.1.4' 
 'N'  'N'   0.0061   0.0033 
 'International Tables Vol C Tables 4.2.6.8 and 6.1.1.4' 
 'O'  'O'   0.0106   0.0060 
 'International Tables Vol C Tables 4.2.6.8 and 6.1.1.4' 
 
_symmetry_cell_setting            'triclinic' 
_symmetry_space_group_name_H-M    'P-1'
 
loop_ 
 _symmetry_equiv_pos_as_xyz 
 'x, y, z' 
 '-x, -y, -z' 
 
_cell_length_a                    7.6345(10) 
_cell_length_b                    8.1774(11) 
_cell_length_c                    8.9355(12) 
_cell_angle_alpha                 89.560(2) 
_cell_angle_beta                  71.295(2) 
_cell_angle_gamma                 80.065(2) 
_cell_volume                      519.8(2) 
_cell_formula_units_Z             2 
_cell_measurement_temperature     150(2) 
_cell_measurement_reflns_used     907
_cell_measurement_theta_min       2.5
_cell_measurement_theta_max       26.55 
 
_exptl_crystal_description        colourless
_exptl_crystal_colour             plate
_exptl_crystal_size_max           0.18
_exptl_crystal_size_mid           0.10
_exptl_crystal_size_min           0.05
_exptl_crystal_density_meas       ? 
_exptl_crystal_density_diffrn     1.701 
_exptl_crystal_density_method     'not measured' 
_exptl_crystal_F_000              272 
_exptl_absorpt_coefficient_mu     0.128 
_exptl_absorpt_correction_type    none 
_exptl_absorpt_correction_T_min   ? 
_exptl_absorpt_correction_T_max   ? 
_exptl_absorpt_process_details    ? 
 
_exptl_special_details 
; 
 ? 
; 
 
_diffrn_ambient_temperature       150(2) 
_diffrn_radiation_wavelength      0.71073 
_diffrn_radiation_type            MoK\a 
_diffrn_radiation_source          'fine-focus sealed tube' 
_diffrn_radiation_monochromator   graphite 
_diffrn_measurement_device_type   'Bruker SMART1000 CCD area detector' 
_diffrn_measurement_method        omega 
_diffrn_detector_area_resol_mean  ? 
_diffrn_standards_number           0 
_diffrn_standards_interval_count  ? 
_diffrn_standards_interval_time   ? 
_diffrn_standards_decay_%         none 
_diffrn_reflns_number             4669 
_diffrn_reflns_av_R_equivalents   0.039
_diffrn_reflns_av_sigmaI/netI     0.085
_diffrn_reflns_limit_h_min       -10 
_diffrn_reflns_limit_h_max        10 
_diffrn_reflns_limit_k_min       -10 
_diffrn_reflns_limit_k_max        10 
_diffrn_reflns_limit_l_min       -11 
_diffrn_reflns_limit_l_max        11 
_diffrn_reflns_theta_min          2.41 
_diffrn_reflns_theta_max          28.71 
_reflns_number_total              2370 
_reflns_number_gt                 1271 
_reflns_threshold_expression      >2sigma(I) 
 
_computing_data_collection        'Bruker SMART version 5.624 (Bruker, 2001)' 
_computing_cell_refinement        'Bruker SAINT version 6.02a (Bruker, 2000)' 
_computing_data_reduction         'Bruker SAINT; Bruker SHELXTL (Bruker, 1997)' 
_computing_structure_solution     'SHELXS-97 (Sheldrick, 1990)' 
_computing_structure_refinement   'SHELXL-97 (Sheldrick, 1997)' 
_computing_molecular_graphics     'Bruker SHELXTL'
_computing_publication_material   'SHELXL-97; PLATON (Spek, 2001)' 
 
_refine_special_details 
; 
 Refinement of F^2^ against ALL reflections.  The weighted R-factor wR and 
 goodness of fit S are based on F^2^, conventional R-factors R are based 
 on F, with F set to zero for negative F^2^. The threshold expression of 
 F^2^ > 2sigma(F^2^) is used only for calculating R-factors(gt) etc. and is 
 not relevant to the choice of reflections for refinement.  R-factors based 
 on F^2^ are statistically about twice as large as those based on F, and R- 
 factors based on ALL data will be even larger. 
; 
 
_refine_ls_structure_factor_coef  Fsqd  
_refine_ls_matrix_type            full 
_refine_ls_weighting_scheme       calc  
_refine_ls_weighting_details 
 'calc w=1/[\s^2^(Fo^2^)+(0.0392P)^2^] where P=(Fo^2^+2Fc^2^)/3' 
_atom_sites_solution_primary      direct 
_atom_sites_solution_secondary   'difference Fourier' 
_atom_sites_solution_hydrogens   'geometrically placed' 
_refine_ls_hydrogen_treatment    'riding model' 
_refine_ls_extinction_method      none 
_refine_ls_extinction_coef        ? 
_refine_ls_number_reflns          2370 
_refine_ls_number_parameters      181 
_refine_ls_number_restraints      0 
_refine_ls_R_factor_all           0.0935 
_refine_ls_R_factor_gt            0.0437 
_refine_ls_wR_factor_ref          0.0983 
_refine_ls_wR_factor_gt           0.0843 
_refine_ls_goodness_of_fit_ref    0.874 
_refine_ls_restrained_S_all       0.874 
_refine_ls_shift/su_max           0.001 
_refine_ls_shift/su_mean          0.000 
 
loop_ 
 _atom_site_label 
 _atom_site_type_symbol 
 _atom_site_fract_x 
 _atom_site_fract_y 
 _atom_site_fract_z 
 _atom_site_U_iso_or_equiv 
 _atom_site_adp_type 
 _atom_site_occupancy 
 _atom_site_symmetry_multiplicity 
 _atom_site_calc_flag 
 _atom_site_refinement_flags 
 _atom_site_disorder_assembly 
 _atom_site_disorder_group 
C1 C -0.4216(3) -0.0548(3) 0.5085(3) 0.0157(5) Uani 1 1 d . . . 
C2 C -0.3055(3) 0.0048(3) 0.5831(3) 0.0164(5) Uani 1 1 d . . . 
C3 C -0.1463(3) -0.1131(3) 0.6070(3) 0.0189(5) Uani 1 1 d . . . 
O4 O -0.0466(2) -0.07442(18) 0.67826(19) 0.0229(4) Uani 1 1 d . . . 
N5 N -0.1167(3) -0.2741(2) 0.5443(2) 0.0198(5) Uani 1 1 d . . . 
H5A H -0.0194 -0.3429 0.5544 0.024 Uiso 1 1 calc R . . 
C6 C -0.2226(3) -0.3381(3) 0.4681(3) 0.0186(5) Uani 1 1 d . . . 
O7 O -0.1806(2) -0.48375(18) 0.41679(19) 0.0255(4) Uani 1 1 d . . . 
C8 C -0.3877(3) -0.2226(3) 0.4524(3) 0.0175(5) Uani 1 1 d . . . 
C9 C -0.5053(3) -0.2782(3) 0.3832(3) 0.0190(5) Uani 1 1 d . . . 
H9A H -0.4830 -0.3918 0.3487 0.023 Uiso 1 1 calc R . . 
C10 C -0.6577(3) -0.1684(3) 0.3632(3) 0.0193(5) Uani 1 1 d . . . 
H10A H -0.7359 -0.2071 0.3125 0.023 Uiso 1 1 calc R . . 
C1' C -0.4420(3) -0.0788(2) -0.0101(2) 0.0154(5) Uani 1 1 d . . . 
C2' C -0.4837(3) -0.2120(3) -0.0843(3) 0.0165(5) Uani 1 1 d . . . 
C3' C -0.3575(3) -0.3762(3) -0.1086(3) 0.0198(5) Uani 1 1 d . . . 
O4' O -0.3780(2) -0.49531(18) -0.17870(19) 0.0262(4) Uani 1 1 d . . . 
N5' N -0.2093(3) -0.3884(2) -0.0494(2) 0.0210(5) Uani 1 1 d . . . 
H5'A H -0.1360 -0.4864 -0.0619 0.025 Uiso 1 1 calc R . . 
C6' C -0.1635(3) -0.2651(3) 0.0267(3) 0.0193(5) Uani 1 1 d . . . 
O7' O -0.0297(2) -0.29298(18) 0.0766(2) 0.0256(4) Uani 1 1 d . . . 
C8' C -0.2852(3) -0.0992(3) 0.0459(3) 0.0178(5) Uani 1 1 d . . . 
C9' C -0.2465(3) 0.0329(3) 0.1173(3) 0.0195(5) Uani 1 1 d . . . 
H9'A H -0.1413 0.0181 0.1540 0.023 Uiso 1 1 calc R . . 
C10' C -0.3635(3) 0.1899(3) 0.1356(3) 0.0191(5) Uani 1 1 d . . . 
H10B H -0.3361 0.2811 0.1839 0.023 Uiso 1 1 calc R . . 
 
loop_ 
 _atom_site_aniso_label 
 _atom_site_aniso_U_11 
 _atom_site_aniso_U_22 
 _atom_site_aniso_U_33 
 _atom_site_aniso_U_23 
 _atom_site_aniso_U_13 
 _atom_site_aniso_U_12 
C1 0.0157(12) 0.0144(12) 0.0159(13) 0.0016(10) -0.0045(10) -0.0015(10) 
C2 0.0132(11) 0.0184(12) 0.0162(12) 0.0011(10) -0.0044(10) -0.0003(10) 
C3 0.0188(13) 0.0194(13) 0.0189(13) 0.0016(10) -0.0060(11) -0.0045(10) 
O4 0.0196(9) 0.0257(10) 0.0259(10) -0.0021(7) -0.0120(8) -0.0017(7) 
N5 0.0166(10) 0.0164(10) 0.0275(12) 0.0002(8) -0.0116(9) 0.0025(8) 
C6 0.0173(12) 0.0184(12) 0.0197(13) 0.0030(10) -0.0064(10) -0.0014(10) 
O7 0.0267(10) 0.0143(9) 0.0362(11) -0.0038(7) -0.0152(8) 0.0043(7) 
C8 0.0158(12) 0.0171(12) 0.0186(13) 0.0023(10) -0.0055(10) -0.0006(10) 
C9 0.0199(13) 0.0140(12) 0.0214(14) -0.0017(10) -0.0061(11) 0.0004(10) 
C10 0.0177(12) 0.0205(13) 0.0202(14) -0.0001(10) -0.0068(10) -0.0033(10) 
C1' 0.0160(12) 0.0155(12) 0.0138(13) 0.0018(10) -0.0045(10) -0.0009(10) 
C2' 0.0187(12) 0.0140(12) 0.0169(13) 0.0014(9) -0.0068(10) -0.0011(10) 
C3' 0.0197(13) 0.0191(13) 0.0214(13) -0.0005(10) -0.0083(11) -0.0021(11) 
O4' 0.0308(10) 0.0171(9) 0.0336(11) -0.0057(8) -0.0161(8) -0.0011(8) 
N5' 0.0207(11) 0.0117(10) 0.0308(13) -0.0018(9) -0.0116(10) 0.0025(9) 
C6' 0.0176(12) 0.0170(13) 0.0215(13) 0.0018(10) -0.0046(10) -0.0015(10) 
O7' 0.0231(9) 0.0197(9) 0.0378(11) -0.0006(8) -0.0181(9) 0.0019(8) 
C8' 0.0168(12) 0.0167(12) 0.0176(13) 0.0011(10) -0.0034(10) -0.0012(10) 
C9' 0.0182(12) 0.0215(13) 0.0200(13) 0.0019(10) -0.0077(11) -0.0037(10) 
C10' 0.0208(13) 0.0155(12) 0.0211(13) -0.0019(10) -0.0070(11) -0.0026(10) 
 
_geom_special_details 
; 
 All esds (except the esd in the dihedral angle between two l.s. planes) 
 are estimated using the full covariance matrix.  The cell esds are taken 
 into account individually in the estimation of esds in distances, angles 
 and torsion angles; correlations between esds in cell parameters are only 
 used when they are defined by crystal symmetry.  An approximate (isotropic) 
 treatment of cell esds is used for estimating esds involving l.s. planes. 
; 
 
loop_ 
 _geom_bond_atom_site_label_1 
 _geom_bond_atom_site_label_2 
 _geom_bond_distance 
 _geom_bond_site_symmetry_2 
 _geom_bond_publ_flag 
C1 C1 1.415(4) 2_456 ? 
C1 C2 1.415(3) . ? 
C1 C8 1.416(3) . ? 
C2 C10 1.376(3) 2_456 ? 
C2 C3 1.487(3) . ? 
C3 O4 1.218(3) . ? 
C3 N5 1.387(3) . ? 
N5 C6 1.378(3) . ? 
C6 O7 1.230(3) . ? 
C6 C8 1.483(3) . ? 
C8 C9 1.378(3) . ? 
C9 C10 1.400(3) . ? 
C10 C2 1.376(3) 2_456 ? 
C1' C1' 1.409(4) 2_455 ? 
C1' C2' 1.412(3) . ? 
C1' C8' 1.423(3) . ? 
C2' C10' 1.368(3) 2_455 ? 
C2' C3' 1.484(3) . ? 
C3' O4' 1.221(3) . ? 
C3' N5' 1.383(3) . ? 
N5' C6' 1.373(3) . ? 
C6' O7' 1.226(3) . ? 
C6' C8' 1.483(3) . ? 
C8' C9' 1.378(3) . ? 
C9' C10' 1.410(3) . ? 
C10' C2' 1.368(3) 2_455 ? 
 
loop_ 
 _geom_angle_atom_site_label_1 
 _geom_angle_atom_site_label_2 
 _geom_angle_atom_site_label_3 
 _geom_angle 
 _geom_angle_site_symmetry_1 
 _geom_angle_site_symmetry_3 
 _geom_angle_publ_flag 
C1 C1 C2 119.4(3) 2_456 . ? 
C1 C1 C8 118.8(3) 2_456 . ? 
C2 C1 C8 121.84(19) . . ? 
C10 C2 C1 120.5(2) 2_456 . ? 
C10 C2 C3 120.4(2) 2_456 . ? 
C1 C2 C3 119.0(2) . . ? 
O4 C3 N5 120.6(2) . . ? 
O4 C3 C2 123.2(2) . . ? 
N5 C3 C2 116.2(2) . . ? 
C6 N5 C3 127.21(19) . . ? 
O7 C6 N5 120.9(2) . . ? 
O7 C6 C8 122.7(2) . . ? 
N5 C6 C8 116.4(2) . . ? 
C9 C8 C1 120.6(2) . . ? 
C9 C8 C6 120.2(2) . . ? 
C1 C8 C6 119.2(2) . . ? 
C8 C9 C10 120.5(2) . . ? 
C2 C10 C9 120.2(2) 2_456 . ? 
C1' C1' C2' 119.6(2) 2_455 . ? 
C1' C1' C8' 118.7(2) 2_455 . ? 
C2' C1' C8' 121.72(19) . . ? 
C10' C2' C1' 120.7(2) 2_455 . ? 
C10' C2' C3' 120.2(2) 2_455 . ? 
C1' C2' C3' 119.06(19) . . ? 
O4' C3' N5' 120.5(2) . . ? 
O4' C3' C2' 123.2(2) . . ? 
N5' C3' C2' 116.32(19) . . ? 
C6' N5' C3' 127.44(19) . . ? 
O7' C6' N5' 121.1(2) . . ? 
O7' C6' C8' 122.5(2) . . ? 
N5' C6' C8' 116.4(2) . . ? 
C9' C8' C1' 120.7(2) . . ? 
C9' C8' C6' 120.3(2) . . ? 
C1' C8' C6' 119.00(19) . . ? 
C8' C9' C10' 119.8(2) . . ? 
C2' C10' C9' 120.5(2) 2_455 . ? 
 
_diffrn_measured_fraction_theta_max    0.882 
_diffrn_reflns_theta_full              27.50 
_diffrn_measured_fraction_theta_full   0.965 
_refine_diff_density_max    0.29 
_refine_diff_density_min   -0.28 
_refine_diff_density_rms    0.06 
